# Supplementary material for: HIV reprograms host m6Am RNA methylome by viral Vpr protein-mediated degradation of PCIF1
Source: PubMed Central journal article supplement (PMC8452764; doi:10.1038/s41467-021-25683-4), 2021-09-20
Supplement: 41467_2021_25683_MOESM2_ESM.pdf [file 41467_2021_25683_MOESM2_ESM.pdf]

### **Description of Additional Supplementary Files**

File Name: Supplementary Data 1

Description: shRNA and oligos used in this study.

File Name: Supplementary Data 2

Description: Peak distribution of the m<sup>6</sup>Am genes in Jurkat T cells.

File Name: Supplementary Data 3

Description: m<sup>6</sup>Am genes with decreased peak density

File Name: Supplementary Data 4

Description: m<sup>6</sup>Am genes interacted with HIV under different GO categories
